# Supplementary material for: Friedelin Alleviates the Pathogenesis of Collagenase-Induced Tendinopathy in Mice by Promoting the Selective Autophagic Degradation of p65
Source: MDPI journal article supplement (doi:10.3390/nu14081673), 2022-04-18
Supplement: s1 [file s1]

## Supplementary Materials

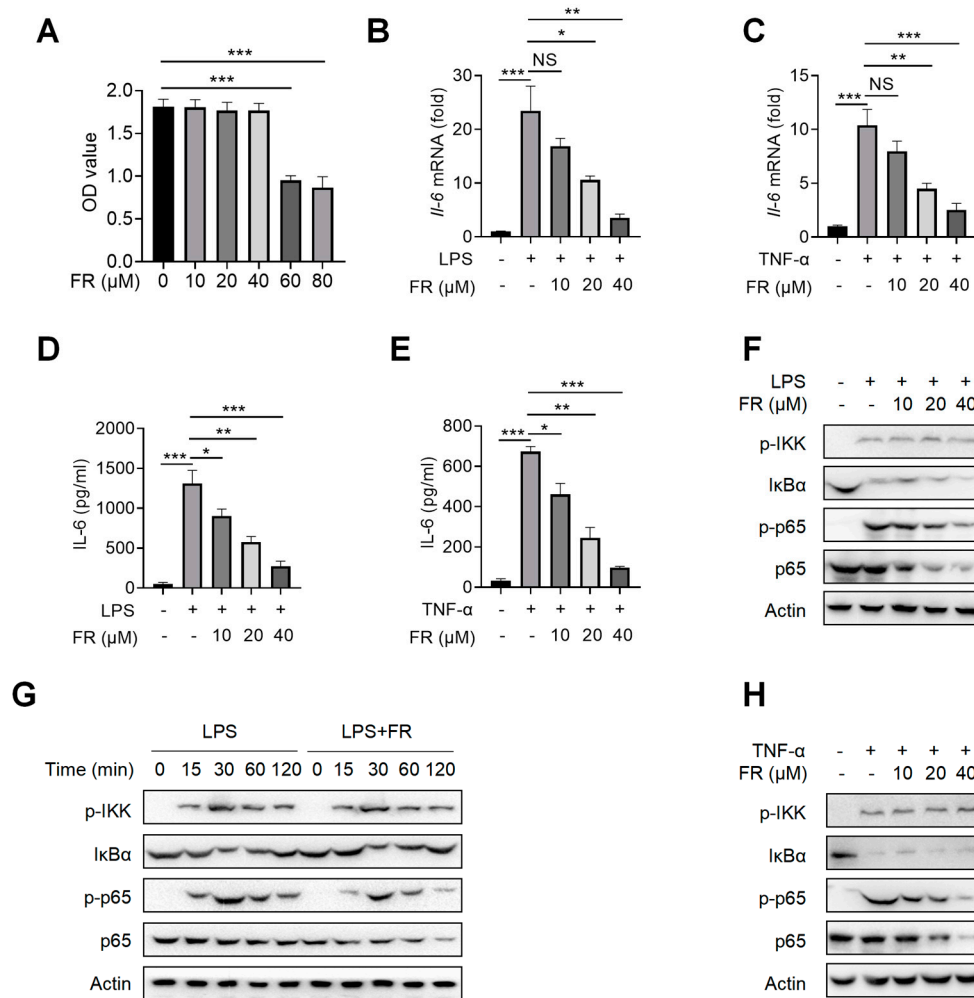

**Figure S1.** FR inhibits NF-κB signaling in tenocytes. **(A)** Tenocytes were treated with FR (0-40 μM) for 24 h, and then cell viability was detected by CCK8 assay. Tenocytes were treated with FR (0-40 μM) combined with LPS (100 ng/ml) or TNF-α (100 ng/ml) for 24 h, and then the cellular RNA, protein, and cell supernatant were collected for the following experiments. **(B and C)** The mRNA expression of IL-6 was detected by qRT-PCR. **(D and E)** The expression of IL-6 protein in cell supernatant was detected by ELISA. **(F and H)** The expression of NF-κB pathway-related proteins (p-IKK, IκBα, p-p65, and p65) were detected by WB. **(G)** Tenocytes were treated with FR (40 μM) and LPS (100 ng/ml) for 0-120 min, and then the expression of NF-κB pathway-related proteins (p-IKK, IκBα, p-p65, and p65) were detected by WB. The data are representative of three independent experiments. Error bars show the means ± SD. \* $P < 0.05$ , \*\* $P < 0.01$ , \*\*\* $P < 0.001$ .

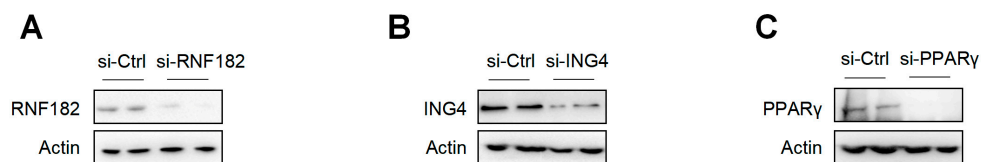

**Figure S2.** Silencing efficiency of siRNA. Tenocytes were transfected with RNF182 siRNA, ING4 siRNA, and PPAR $\gamma$  siRNA for 24 h, and the proteins expression of RNF182 (**A**), ING4 (**B**), and PPAR $\gamma$  (**C**) were detected by WB.
